# Supplementary material for: The fission yeast cytokinetic ring component Fic1 promotes septum formation
Source: Oxford University Press journal article supplement (doi:10.1242/bio.059957), 2023-05-09
Supplement: bio059957supp.pdf [file bio059957supp.pdf]

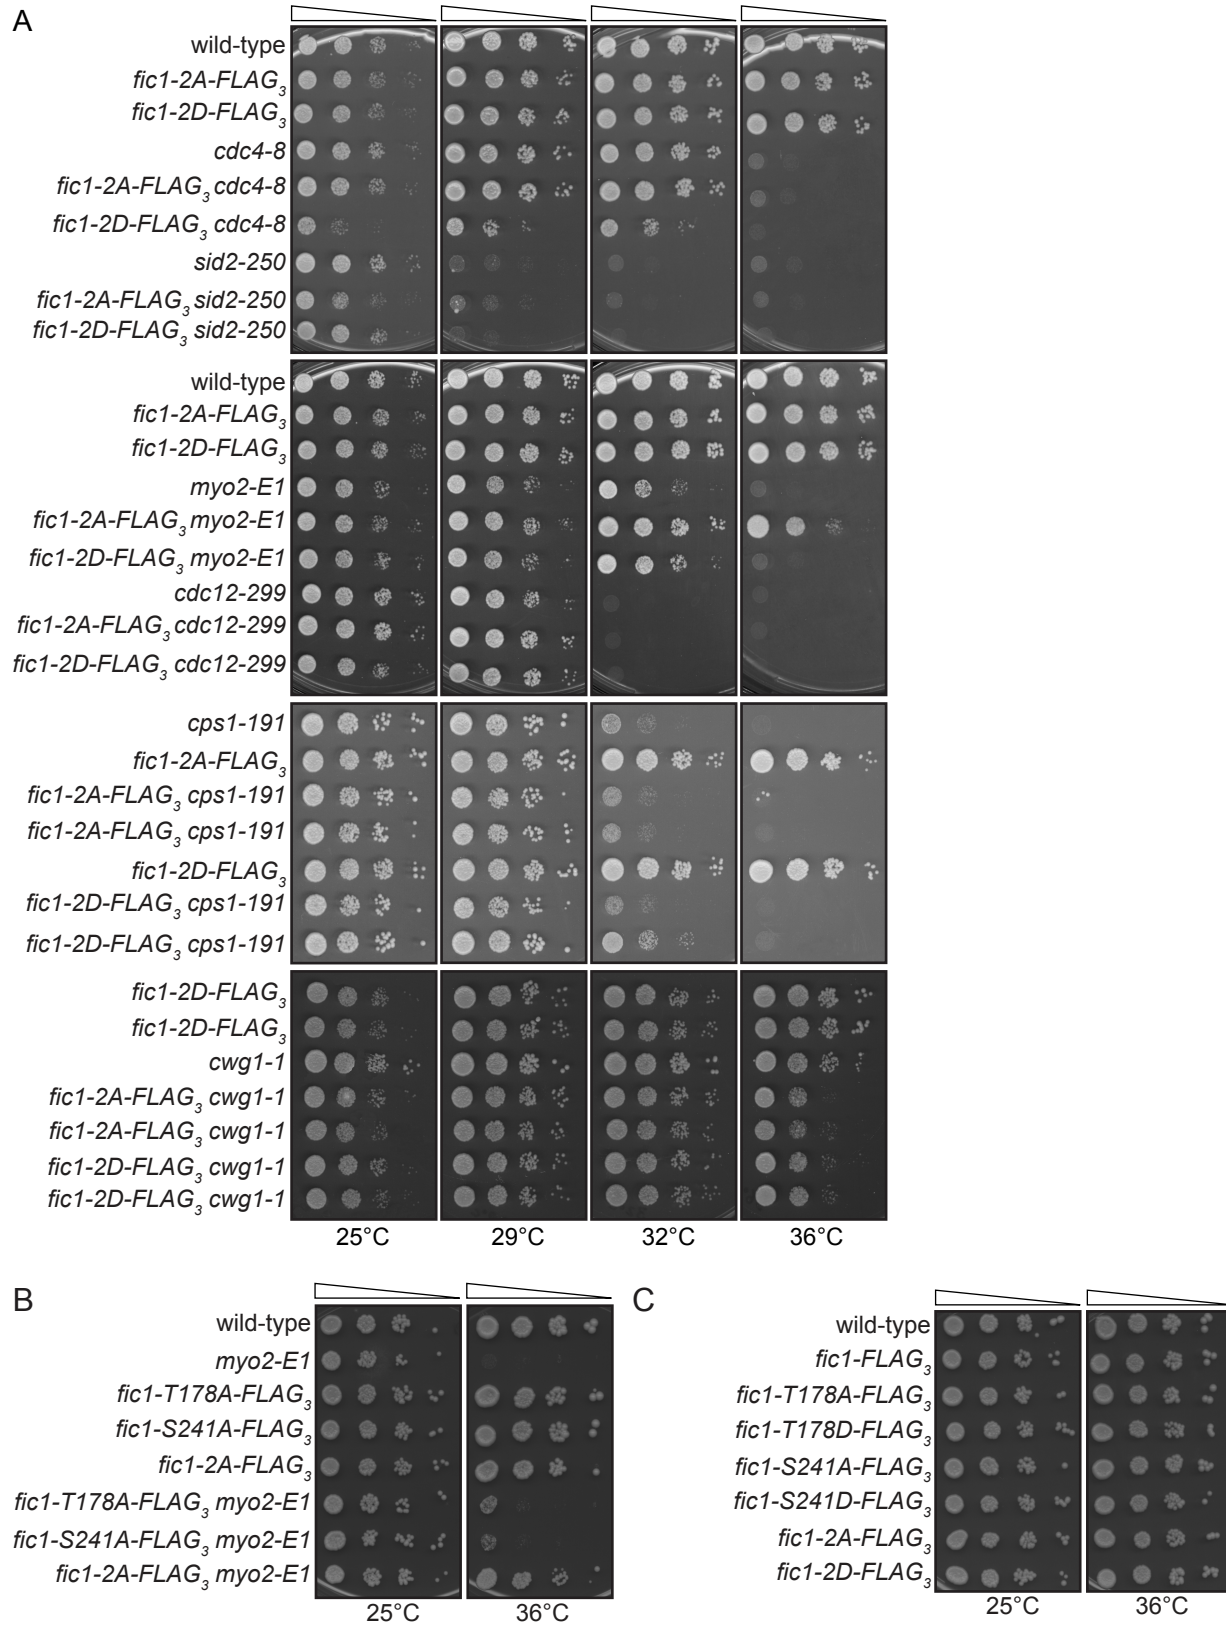

**Fig. S1. Individual or single *fic1* phosphomutants are not temperature-sensitive.** A-C) Ten-fold serial dilutions of the indicated strains were spotted on YE agar media and incubated at the indicated temperatures for 3-5 days.

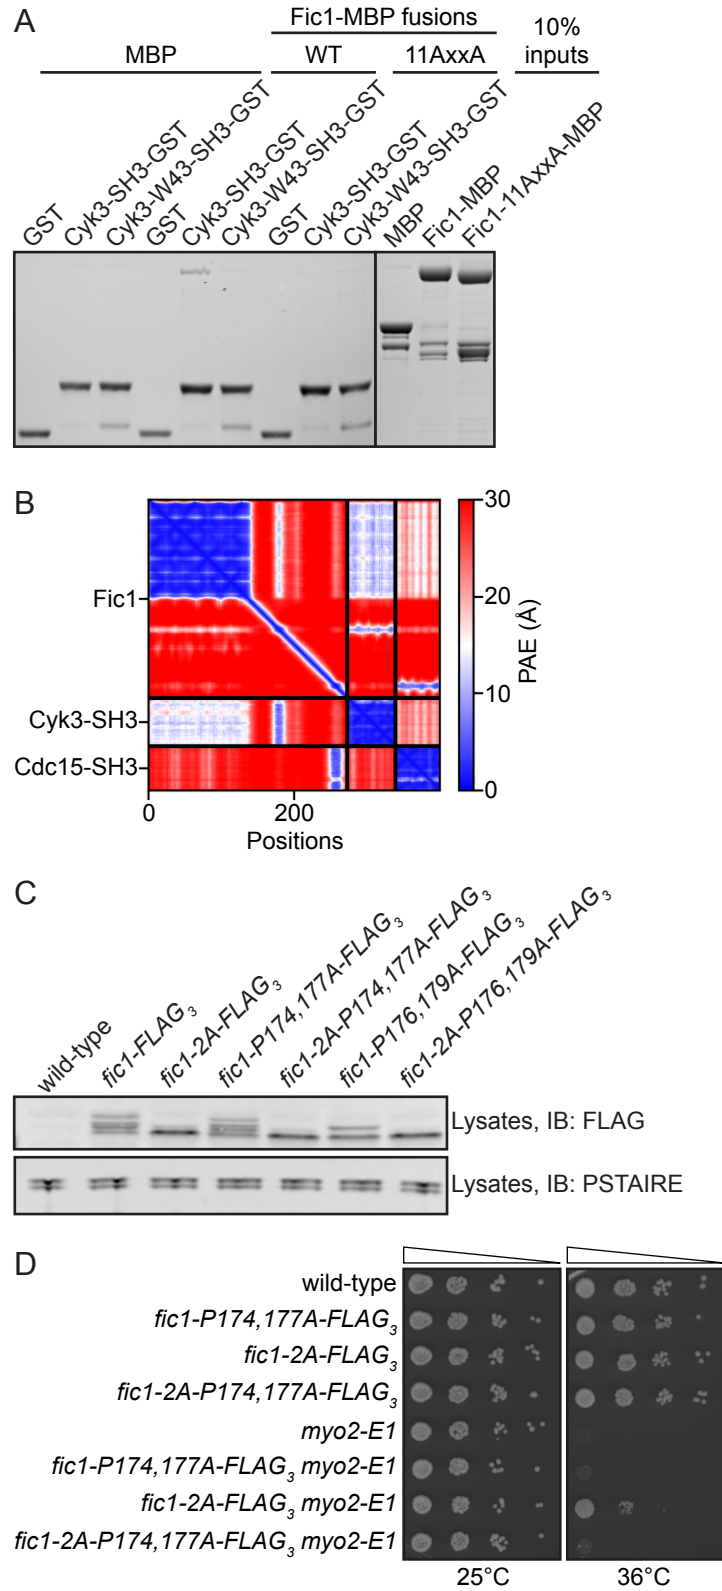

**Fig. S2. P174,177 is required for *fic1-2A*'s suppression of *myo2-E1*.** A) Coomassie-stained SDS-PAGE of *in vitro* binding assays using the indicated recombinant proteins. B) The predicted aligned error (PAE) map from the molecular modeling between Fic1, Cyk3-SH3, and Cdc15-SH3. C) Lysates from cells of the indicated genotypes were immunoblotted with anti-FLAG antibody to assess Fic1-FLAG<sub>3</sub> gel mobilities and anti-CDK (PSTAIRES) antibody as a loading control. D) Ten-fold serial dilutions of the indicated strains were spotted on YE agar media and incubated at the indicated 11 temperatures for 3-5 days.

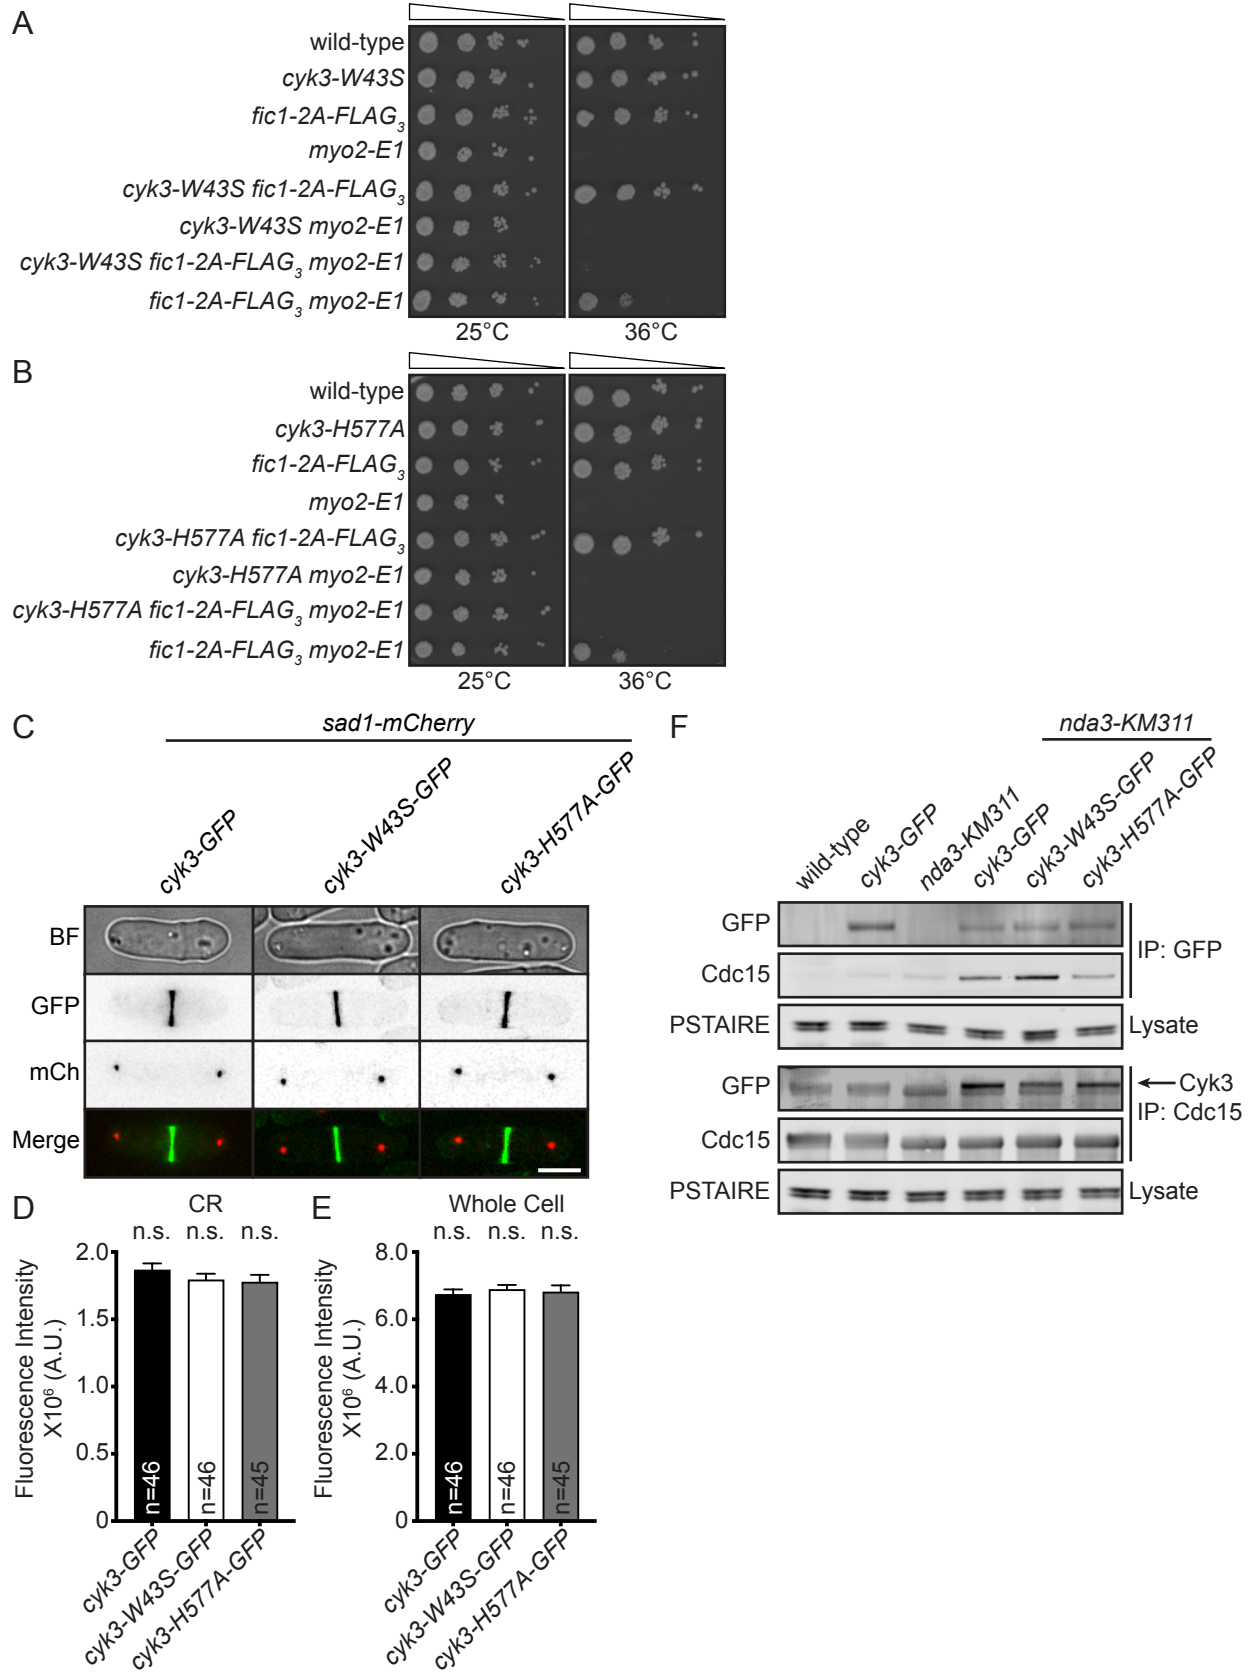

**Fig. S3. Cyk3's SH3 and transglutaminase-like domain are required for *fic1-2A*'s suppression of *myo2-E1*.** A and B) Ten-fold serial dilutions of the indicated strains were spotted on YE agar media and incubated at the indicated temperatures for 3-5 days. C) Live-cell bright field (BF), GFP, mCherry (mCh) and merged GFP/mCh images of cells of indicated genotypes during cytokinesis. Scale bar: 5  $\mu$ m. D and E) Quantification of CR (D) and whole cell (E) fluorescence intensities for cells of indicated genotypes. Data from three trials per genotype presented as mean  $\pm$  S.E.M. n.s., not significant, one-way ANOVA. F) Anti-GFP or anti-Cdc15 immunoprecipitates from cells of indicated genotypes were blotted with an anti-GFP or anti-Cdc15 antibody. Lysate samples were blotted with anti-CDK (PSTAIRE) as an input control for the immunoprecipitations. Arrow indicates Cyk3-GFP protein band.

**Table S1. *S. pombe* strains used in this study**

|                 |                                                                                                                                                                     |                      |
|-----------------|---------------------------------------------------------------------------------------------------------------------------------------------------------------------|----------------------|
| <b>Figure 1</b> |                                                                                                                                                                     |                      |
| KGY246          | <i>ade6-M210 ura4-D18 leu1-32 h<sup>-</sup></i>                                                                                                                     | Lab Stock            |
| KGY11856        | <i>fic1-T178A, S241A-FLAG<sub>3</sub>:kan<sup>R</sup> ade6-M210 ura4-D18 leu1-32 h<sup>+</sup></i>                                                                  | Lab Stock            |
| KGY11861        | <i>fic1-T178D, S241D-FLAG<sub>3</sub>:kan<sup>R</sup> ade6-M210 ura4-D18 leu1-32 h<sup>+</sup></i>                                                                  | Lab Stock            |
| KGY2971         | <i>myo2-E1 ade6-M216 leu1-32 ura4-D18 h<sup>+</sup></i>                                                                                                             | Lab Stock            |
| KGY1018-2       | <i>myo2-E1 fic1-T178A, S241A-FLAG<sub>3</sub>:kan<sup>R</sup> ade6-M210 leu1-32 ura4-D18 h<sup>-</sup></i>                                                          | This Study           |
| KGY15368        | <i>myo2-E1 fic1-T178D, S241D-FLAG<sub>3</sub>:kan<sup>R</sup> ade6-M210 leu1-32 ura4-D18 h<sup>+</sup></i>                                                          | This Study           |
| KGY6008         | <i>fic1::ura4<sup>+</sup> leu1-32 ura4-D18 ade6-M21X h<sup>+</sup></i>                                                                                              | Lab Stock            |
| KGY6665         | <i>fic1::ura4<sup>+</sup> myo2-E1 leu1-32 ura4-D18 ade6-M21X h<sup>+</sup></i>                                                                                      | Lab Stock            |
| KGY5305-2       | <i>sid4-GFP:kan<sup>R</sup> rlc1-mNeonGreen:hyg<sup>R</sup> ade6-M210 ura4-D18 leu1-32 h<sup>+</sup></i>                                                            | This Study           |
| KGY5659-2       | <i>fic1::ura4<sup>+</sup> sid4-GFP:kan<sup>R</sup> rlc1-mNeonGreen:hyg<sup>R</sup> ade6-M21X ura4-D18 leu1-32 h<sup>-</sup></i>                                     | This Study           |
| KGY5602-2       | <i>fic1-T178A, S241A-FLAG<sub>3</sub>:kan<sup>R</sup> sid4-GFP:kan<sup>R</sup> rlc1-mNeonGreen:hyg<sup>R</sup> ade6-M210 ura4-D18 leu1-32 h<sup>+</sup></i>         | This Study           |
| KGY5334-2       | <i>fic1-T178D, S241D-FLAG<sub>3</sub>:kan<sup>R</sup> sid4-GFP:kan<sup>R</sup> rlc1-mNeonGreen:hyg<sup>R</sup> ade6-M210 ura4-D18 leu1-32 h<sup>+</sup></i>         | This Study           |
| <b>Figure 2</b> |                                                                                                                                                                     |                      |
| KGY2152-2       | <i>act1:LactC2-GFP:nat<sup>R</sup> sad1-GFP:kan<sup>R</sup> ade6-M210 ura4-D18 leu1-32 h<sup>+</sup></i>                                                            | (Curto et al., 2014) |
| KGY4102-2       | <i>fic1-T178A, S241A-FLAG<sub>3</sub>:kan<sup>R</sup> act1:LactC2-GFP:nat<sup>R</sup> sad1-GFP:kan<sup>R</sup> ade6-M210 ura4-D18 leu1-32 h<sup>+</sup></i>         | This Study           |
| KGY3655-2       | <i>myo2-E1 act1:LactC2-GFP:nat<sup>R</sup> sad1-GFP:kan<sup>R</sup> ade6-M210 ura4-D18 leu1-32 h<sup>+</sup></i>                                                    | This Study           |
| KGY4138-2       | <i>fic1-T178A, S241A-FLAG<sub>3</sub>:kan<sup>R</sup> myo2-E1 act1:LactC2-GFP:nat<sup>R</sup> sad1-GFP:kan<sup>R</sup> ade6-M210 ura4-D18 leu1-32 h<sup>+</sup></i> | This Study           |
| <b>Figure 3</b> |                                                                                                                                                                     |                      |
| KGY11876        | <i>fic1-P257A-FLAG<sub>3</sub>:kan<sup>R</sup> leu1-32 ura4-D18 ade6-M21X h<sup>+</sup></i>                                                                         | Lab stock            |
| KGY11934        | <i>fic1-T178A, S241A, P257A-FLAG<sub>3</sub>:kan<sup>R</sup> leu1-32 ura4-D18 ade6-M21X h<sup>+</sup></i>                                                           | This Study           |
| KGY3373-2       | <i>fic1-P257A-FLAG<sub>3</sub>:kan<sup>R</sup> myo2-E1 leu1-32 ura4-D18 ade6-M21X h<sup>-</sup></i>                                                                 | This Study           |
| KGY19546        | <i>fic1-T178A, S241A, P257A-FLAG<sub>3</sub>:kan<sup>R</sup> myo2-E1 leu1-32 ura4-D18 ade6-M21X h<sup>-</sup></i>                                                   | This Study           |
| KGY7490         | <i>cyk3::ura<sup>+</sup> ade6-M21X leu1-32 ura4-D18 h<sup>-</sup></i>                                                                                               | Lab stock            |
| KGY15446        | <i>cyk3::ura4<sup>+</sup> fic1-T178, S241A-FLAG<sub>3</sub>:kan<sup>R</sup> ade6-M21X leu1-32 ura4-D18 h<sup>+</sup></i>                                            | This Study           |
| KGY7635         | <i>cyk3::ura4<sup>+</sup> myo2-E1 ade6-M21X leu1-32 ura4-D18 h<sup>-</sup></i>                                                                                      | This Study           |

|                             |                                                                                                                                             |            |
|-----------------------------|---------------------------------------------------------------------------------------------------------------------------------------------|------------|
| KGY15443                    | <i>cyk3::ura4<sup>+</sup> fic1-T178,S241A-FLAG<sub>3</sub>:kan<sup>R</sup> myo2-E1 ade6-M21X leu1-32 ura4-D18 h<sup>+</sup></i>             | This Study |
| KGY3873-2                   | <i>cps1-191 fic1-FLAG<sub>3</sub>:kan<sup>R</sup> chs2-V5<sub>3</sub>:hyg<sup>R</sup> lys1-131 ade6-M21X ura4-D18 leu1-32 h<sup>-</sup></i> | This Study |
| <b>Figure 4</b>             |                                                                                                                                             |            |
| KGY6365-2                   | <i>chs2::kan<sup>R</sup> ade6-M210 ura4-D18 leu1-32 h<sup>-</sup></i>                                                                       | This Study |
| KGY6580-2                   | <i>chs2::kan<sup>R</sup> fic1-T178A,S241A-FLAG<sub>3</sub>:kan<sup>R</sup> ade6-M210 ura4-D18 leu1-32 h<sup>-</sup></i>                     | This Study |
| KGY6570-2                   | <i>chs2::kan<sup>R</sup> myo2-E1 ade6-M210 ura4-D18 leu1-32 h<sup>+</sup></i>                                                               | This Study |
| KGY6571-2                   | <i>chs2::kan<sup>R</sup> fic1-T178A,S241A-FLAG<sub>3</sub>:kan<sup>R</sup> myo2-E1 ade6-M210 ura4-D18 leu1-32 h<sup>+</sup></i>             | This Study |
| KGY6434-2                   | <i>fic1::ura4<sup>+</sup> chs2::kan<sup>R</sup> leu1-32 ura4-D18 ade6-M21X h<sup>+</sup></i>                                                | This Study |
| KGY15954                    | <i>fic1::ura4<sup>+</sup> cyk3::ura4<sup>+</sup> leu1-32 ura4-D18 ade6-M21X h<sup>-</sup></i>                                               | Lab stock  |
| KGY6930-2                   | <i>chs2::kan<sup>R</sup> cyk3::ura4<sup>+</sup> ade6-M21X leu1-32 ura4-D18 h<sup>-</sup></i>                                                | This Study |
| KGY7101-2                   | <i>chs2::kan<sup>R</sup> cyk3::ura4<sup>+</sup> fic1::ura4<sup>+</sup> ade6-M21X leu1-32 ura4-D18 h<sup>-</sup></i>                         | This Study |
| <b>Supplemental Figures</b> |                                                                                                                                             |            |
| <b>Figure S1</b>            |                                                                                                                                             |            |
| KGY441                      | <i>cdc4-8 ade6-M210 ura4-D18 h<sup>+</sup></i>                                                                                              | Lab Stock  |
| KGY15363                    | <i>fic1-T178A,S241A-FLAG<sub>3</sub>:kan<sup>R</sup> cdc4-8 ade6-M21X ura4-D18 h<sup>-</sup></i>                                            | This Stock |
| KGY15364                    | <i>fic1-T178A,S241D-FLAG<sub>3</sub>:kan<sup>R</sup> cdc4-8 ade6-M21X ura4-D18 h<sup>+</sup></i>                                            | This Stock |
| KGY1105                     | <i>sid2-250 ade6-M21X ura4-D18 leu1-32 h<sup>-</sup></i>                                                                                    | Lab Stock  |
| KGY15374                    | <i>fic1-T178,S241A-FLAG<sub>3</sub>:kan<sup>R</sup> sid2-250 ade6-M210 ura4-D18 leu1-32 h<sup>-</sup></i>                                   | This Study |
| KGY15375                    | <i>fic1-T178,S241D-FLAG<sub>3</sub>:kan<sup>R</sup> sid2-250 ade6-M210 ura4-D18 leu1-32 h<sup>-</sup></i>                                   | This Study |
| KGY748                      | <i>cdc12-299 h<sup>-</sup></i>                                                                                                              | Lab Stock  |
| KGY15365                    | <i>fic1-T178,S241A-FLAG<sub>3</sub>:kan<sup>R</sup> cdc12-299 leu1-32 ura4-D18 h<sup>+</sup></i>                                            | This Study |
| KGY15366                    | <i>fic1-T178,S241D-FLAG<sub>3</sub>:kan<sup>R</sup> cdc12-299 299 leu1-32 ura4-D18 h<sup>+</sup></i>                                        | This Study |
| KGY17207                    | <i>cps1-191 ura4-D18 leu1-32 ade6-M210 lys1-131 h<sup>+</sup></i>                                                                           | Lab Stock  |
| KGY17771                    | <i>cps1-191 fic1-T178A,S241A-FLAG<sub>3</sub>:kan<sup>R</sup> ura4-D18 ade6-M21X h<sup>-</sup></i>                                          | This Study |
| KGY17773                    | <i>cps1-191 fic1-T178D,S241D-FLAG<sub>3</sub>:kan<sup>R</sup> ura4-D18 ade6-M21X h<sup>-</sup></i>                                          | This Study |
| KGY11106                    | <i>cwg1-1 leu1-32 h<sup>-</sup></i>                                                                                                         | Lab Stock  |
| KGY17681                    | <i>cwg1-1 fic1-T178A,S241A-FLAG<sub>3</sub>:kan<sup>R</sup> ade6-M21X ura4-D18 leu1-32 h<sup>-</sup></i>                                    | This Study |
| KGY17683                    | <i>cwg1-1 (bgs4 ts) fic1-T178D,S241D-FLAG<sub>3</sub>:kan<sup>R</sup> ade6-M21X ura4-D18 leu1-32 h<sup>-</sup></i>                          | This Study |
| KGY19522                    | <i>fic1-T178A-FLAG<sub>3</sub>:kan<sup>R</sup> ade6-M210 ura4-D18 leu1-32 h<sup>+</sup></i>                                                 | Lab Stock  |

|                  |                                                                                                                      |            |
|------------------|----------------------------------------------------------------------------------------------------------------------|------------|
| KGY19523         | <i>fic1-S241A-FLAG<sub>3</sub>:kan<sup>R</sup> ade6-M210 ura4-D18 leu1-32 h<sup>+</sup></i>                          | Lab Stock  |
| KGY7615-2        | <i>fic1-T178A-FLAG<sub>3</sub>:kan<sup>R</sup> myo2-E1 ade6-M210 ura4-D18 leu1-32 h<sup>-</sup></i>                  | This Study |
| KGY7628-2        | <i>fic1-S241A-FLAG<sub>3</sub>:kan<sup>R</sup> myo2-E1 ade6-M210 ura4-D18 leu1-32 h<sup>-</sup></i>                  | This Study |
| KGY6288          | <i>fic1-FLAG<sub>3</sub>:kan<sup>R</sup> ade6-M216 leu1-32 ura4-D18 h<sup>-</sup></i>                                | Lab stock  |
| KGY11908         | <i>fic1-T178D-FLAG<sub>3</sub>:kan<sup>R</sup> ade6-M210 ura4-D18 leu1-32 h<sup>+</sup></i>                          | Lab stock  |
| KGY11854         | <i>fic1-S241D-FLAG<sub>3</sub>:kan<sup>R</sup> leu1-32 ura4-D18 ade6-M21X h<sup>+</sup></i>                          | Lab stock  |
| <b>Figure S2</b> |                                                                                                                      |            |
| KGY4705-2        | <i>fic1-P174,177A-FLAG<sub>3</sub>:kan<sup>R</sup> leu1-32 ura4-D18 ade6-M21X h<sup>+</sup></i>                      | This Study |
| KGY4774-2        | <i>fic1-T178A,S241A-P174,177A-FLAG<sub>3</sub>:kan<sup>R</sup> leu1-32 ura4-D18 ade6-M21X h<sup>+</sup></i>          | This Study |
| KGY4706-2        | <i>fic1-P176,179A-FLAG<sub>3</sub>:kan<sup>R</sup> leu1-32 ura4-D18 ade6-M21X h<sup>+</sup></i>                      | This Study |
| KGY4708-2        | <i>fic1-T178A,S241A-P176,179A-FLAG<sub>3</sub>:kan<sup>R</sup> leu1-32 ura4-D18 ade6-M21X h<sup>+</sup></i>          | This Study |
| KGY4717-2        | <i>fic1-P174,177A-FLAG<sub>3</sub>:kan<sup>R</sup> myo2-E1 leu1-32 ura4-D18 ade6-M21X h<sup>+</sup></i>              | This Study |
| KGY4852-2        | <i>fic1-T178A,S241A-P174,177A-FLAG<sub>3</sub>:kan<sup>R</sup> myo2-E1 leu1-32 ura4-D18 ade6-M21X h<sup>-</sup></i>  | This Study |
| <b>Figure S3</b> |                                                                                                                      |            |
| KGY899-2         | <i>cyk3-W43S ade6-M21X leu1-32 ura4-D18 h<sup>-</sup></i>                                                            | This Study |
| KGY2086-2        | <i>cyk3-W43S fic1-T178A,S241A-FLAG<sub>3</sub>:kan<sup>R</sup> ade6-M21X leu1-32 ura4-D18 h<sup>+</sup></i>          | This Study |
| KGY2141-2        | <i>cyk3-W43S myo2-E1 ade6-M21X leu1-32 ura4-D18 h<sup>-</sup></i>                                                    | This Study |
| KGY2505-3        | <i>cyk3-W43S fic1-T178A,S241A-FLAG<sub>3</sub>:kan<sup>R</sup> myo2-E1 ade6-M21X leu1-32 ura4-D18 h<sup>-</sup></i>  | This Study |
| KGY1886-2        | <i>cyk3-H577A ade6-M21X leu1-32 ura4-D18 h<sup>-</sup></i>                                                           | This Study |
| KGY2120-2        | <i>cyk3-H577A fic1-T178A,S241A-FLAG<sub>3</sub>:kan<sup>R</sup> ade6-M21X leu1-32 ura4-D18 h<sup>+</sup></i>         | This Study |
| KGY2161-2        | <i>cyk3-H577A myo2-E1 ade6-M21X leu1-32 ura4-D18 h<sup>-</sup></i>                                                   | This Study |
| KGY2559-2        | <i>cyk3-H577A fic1-T178A,S241A-FLAG<sub>3</sub>:kan<sup>R</sup> myo2-E1 ade6-M21X leu1-32 ura4-D18 h<sup>-</sup></i> | This Study |
| KGY6897          | <i>cyk3-FLAG<sub>3</sub>:kan<sup>R</sup> ade6-M21X leu1-32 ura4-D18 h<sup>-</sup></i>                                | Lab Stock  |
| KGY2460-2        | <i>cyk3-GFP:kan<sup>R</sup> sad1-mCherry:nat<sup>R</sup> ade6-M210 ura4-D18 leu1-32 h<sup>-</sup></i>                | This Study |
| KGY2362-2        | <i>cyk3-W43S-GFP:kan<sup>R</sup> sad1-mCherry:nat<sup>R</sup> ade6-M21X leu1-32 ura4-D18 h<sup>-</sup></i>           | This Study |
| KGY2364-2        | <i>cyk3-H577A-GFP:kan<sup>R</sup> sad1-mCherry:nat<sup>R</sup> ade6-M21X leu1-32 ura4-D18 h<sup>-</sup></i>          | This Study |
| KGY2202-3        | <i>cyk3-GFP:kan<sup>R</sup> ade6-M210 ura4-D18 leu1-32 h<sup>-</sup></i>                                             | Lab Stock  |
| KGY56            | <i>nda3-km311 leu1-32 h<sup>+</sup></i>                                                                              | Lab Stock  |



|           |                                                                                           |            |
|-----------|-------------------------------------------------------------------------------------------|------------|
| KGY2890-2 | <i>cyk3-GFP:kan<sup>R</sup> nda3-km311 ade6-M210 ura4-D18 leu1-32 h<sup>-</sup></i>       | This Study |
| KGY2895-2 | <i>cyk3-W43S-GFP:kan<sup>R</sup> nda3-km311 ura4-D18 leu1-32 h<sup>-</sup></i>            | This Study |
| KGY2892-2 | <i>cyk3-H577A-GFP:kan<sup>R</sup> nda3-km311 ade6-M210 ura4-D18 leu1-32 h<sup>-</sup></i> | This Study |
